# Supplementary material for: BotCl, the First Chlorotoxin-like Peptide Inhibiting Newcastle Disease Virus: The Emergence of a New Scorpion Venom AMPs Family
Source: MDPI journal article supplement (doi:10.3390/molecules28114355), 2023-05-26
Supplement: s1 [file s1]

Supplementary data

**Figure S1 : Hemolysis assay of venom fractions.**

(A) Standard curve of water.

(B) OD mean values of crude Bot venom and BotCl

**(A)**

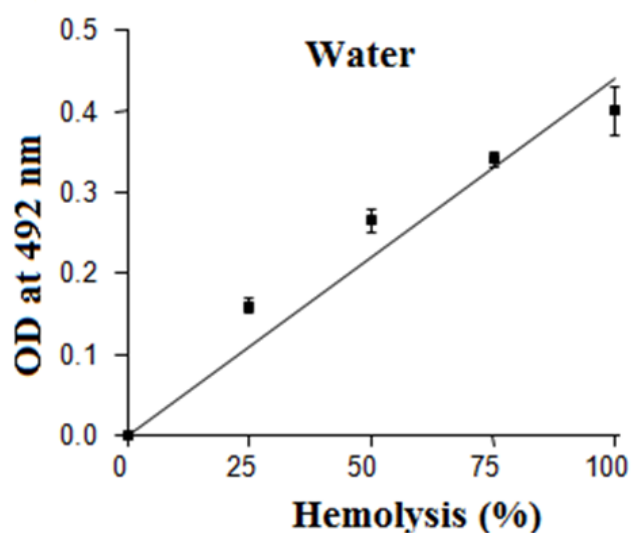

**(B)**

| Incubation<br>Fraction OD | 0 h    | 24 h   |
|---------------------------|--------|--------|
|                           |        |        |
| Bot                       | 0.0000 | 0.0844 |
| BotCl                     | 0.0000 | 0.0700 |

**Table S1:** binding energy and dissociation constant values of the best docking solutions

| solution<br>number | $\Delta G$ | Kd       |
|--------------------|------------|----------|
| 2                  | -12.9      | 8.60E-10 |
| 3                  | -13.3      | 4.10E-10 |
| 5                  | -11.3      | 1.00E-08 |
| 6                  | -11.9      | 3.90E-09 |
